# Supplementary material for: Transcriptomic profiles of Dunaliella salina in response to hypersaline stress
Source: PubMed Central journal article supplement (PMC6998148; doi:10.1186/s12864-020-6507-2), 2020-02-03
Supplement: 12864_2020_6507_MOESM1_ESM.pdf [file 12864_2020_6507_MOESM1_ESM.pdf]

Table S1, the data qualities of the libraries of the second-generation sequencing

| Sample* | Raw Reads | Clean reads | Clean bases | Error (%) | Q20 (%) | Q30 (%) | GC (%) |
|---------|-----------|-------------|-------------|-----------|---------|---------|--------|
| 0h_R1   | 64161390  | 61893000    | 9.28G       | 0.02      | 97.21   | 92.88   | 56.38  |
| 0h_R2   | 63970244  | 61949592    | 9.29G       | 0.01      | 97.28   | 93.03   | 56.53  |
| 0h_R3   | 71457828  | 68976474    | 10.35G      | 0.01      | 97.40   | 93.27   | 56.56  |
| 0.5h_R1 | 68365392  | 66752244    | 10.01G      | 0.01      | 97.98   | 94.70   | 56.45  |
| 0.5h_R2 | 49585896  | 49411914    | 7.41G       | 0.01      | 97.91   | 94.43   | 56.63  |
| 0.5h_R3 | 70751998  | 68453128    | 10.27G      | 0.01      | 97.94   | 94.62   | 56.62  |
| 1h_R1   | 62322764  | 60612712    | 9.09G       | 0.01      | 97.82   | 94.39   | 56.73  |
| 1h_R2   | 62349100  | 60604888    | 9.09G       | 0.01      | 97.96   | 94.64   | 56.79  |
| 1h_R3   | 63123074  | 61320462    | 9.2G        | 0.01      | 97.93   | 94.58   | 56.63  |
| 2h_R1   | 64791654  | 63006452    | 9.45G       | 0.01      | 97.97   | 94.67   | 56.67  |
| 2h_R2   | 60709782  | 58681302    | 8.8G        | 0.01      | 98.00   | 94.74   | 56.72  |
| 2h_R3   | 52398294  | 52216548    | 7.83G       | 0.01      | 97.86   | 94.33   | 56.40  |

\*0h\_R1, 0h\_R2, and 0h\_R3 represent three replicates of the 0-hour stress (no salt stress applied) group; 0.5h\_R1, 0.5h\_R2, and 0.5h\_R3 represent three replicates of the 0.5-hour stress group; 1h\_R1, 1h\_R2, and 1h\_R3 represent three replicates of the 1-hour stress group; 2h\_R1, 2h\_R2, and 2h\_R3 represent three replicates of the 2-hour stress group;

Table S2, transcripts properties from the third-generation sequencing

| <b>Transcripts length distribution</b> |                  |                    |                 |          |          |
|----------------------------------------|------------------|--------------------|-----------------|----------|----------|
|                                        | 200-500 bp       | 500-1 kbp          | 1-2 kbp         | >2 kbp   | Total    |
| Number of transcripts                  | 6495             | 17950              | 17553           | 1866     | 43864    |
| <b>Transcripts length statistics</b>   |                  |                    |                 |          |          |
| Min Length (bp)                        | Mean Length (bp) | Median Length (bp) | Max Length (bp) | N50 (bp) | N90 (bp) |
| 242                                    | 1009             | 918                | 8978            | 1175     | 587      |

Table S3, GO terms enriched from the down-regulated genes

| 0.5 h VS 0 h |                                        |                          |
|--------------|----------------------------------------|--------------------------|
| GO_accession | Description                            | Number of Genes involved |
| GO:0030246   | carbohydrate binding*                  | 8                        |
| GO:0005515   | protein binding*                       | 69                       |
| 1 h VS 0 h   |                                        |                          |
| GO:0006259   | DNA metabolic process                  | 44                       |
| GO:0005515   | protein binding                        | 103                      |
| GO:0005856   | cytoskeleton                           | 19                       |
| GO:0009101   | glycoprotein biosynthetic process      | 12                       |
| GO:0006024   | glycosaminoglycan biosynthetic process | 11                       |
| GO:0030286   | dynein complex                         | 11                       |
| 2 h VS 0 h   |                                        |                          |
| GO:0005515   | protein binding                        | 272                      |
| GO:0016740   | transferase activity                   | 274                      |
| GO:0036211   | protein modification process           | 90                       |
| GO:0006259   | DNA metabolic process                  | 104                      |
| GO:2001141   | regulation of RNA biosynthetic process | 117                      |
| GO:0005856   | cytoskeleton                           | 52                       |
| GO:0006024   | glycosaminoglycan biosynthetic process | 20                       |
| GO:0009101   | glycoprotein biosynthetic process      | 29                       |
| GO:0010167   | response to nitrate                    | 26                       |
| GO:0015698   | inorganic anion transport              | 32                       |
| GO:0006869   | lipid transport                        | 15                       |
| GO:0015074   | DNA integration                        | 18                       |
| GO:0006914   | autophagy                              | 21                       |
| GO:0005096   | GTPase activator activity              | 13                       |
| GO:0030286   | dynein complex                         | 27                       |

\*not significantly enriched

Table S4, up-regulation of some key genes on different stress time compare with that before stress

| Gene name<br>Swissprot Description                    | log <sub>2</sub> (FoldChange)* |          |          |
|-------------------------------------------------------|--------------------------------|----------|----------|
|                                                       | 0.5h VS 0h                     | 1h VS 0h | 2h VS 0h |
| Carbonic anhydrase                                    | 0.53                           | 0.41     | 0.53     |
| Ribisco activase                                      | FALSE                          | 1.02     | 1.48     |
| Catalase isozyme B                                    | FALSE                          | FALSE    | 0.70     |
| L-ascorbate peroxidase 8                              | FALSE                          | 0.44     | 1.14     |
| starch phosphorylase (PYG)                            | 0.57                           | 1.00     | 2.03     |
| Phosphoglucomutase (PGM)                              | 0.71                           | 2.08     | 3.71     |
| Glucose-6-phosphate isomerase (GPI)                   | FALSE                          | 1.25     | 1.97     |
| ATP-dependent 6-phosphofructokinase 5 (PFK1)          | FALSE                          | FALSE    | 0.56     |
| Triosephosphate isomerase (TPI)                       | 0.66                           | 1.04     | 1.43     |
| Pyruvate kinase (PK)                                  | FALSE                          | 2.25     | 2.04     |
| glycerol-3-phosphate dehydrogenase (DsGPDH2)          | 0.51                           | 0.87     | 1.05     |
| Acetyl-CoA carboxylase                                | 0.52                           | 0.55     | FALSE    |
| Delta-12 desaturase                                   | FALSE                          | 0.56     | 0.58     |
| Acyl-ACP desaturase                                   | 0.58                           | 0.63     | 0.14     |
| Phosphatidyl-N-methylethanolamine N-methyltransferase | FALSE                          | FALSE    | 1.20     |
| CDP-Ethanolamine:DAG ethanolamine phosphotransferase  | FALSE                          | FALSE    | 3.53     |
| Lysophospholipid acyltransferase                      | FALSE                          | FALSE    | 1.37     |
| Heat shock 70 kDa protein (HSP70)                     | 0.43                           | 2.00     | 3.70     |
| Heat shock protein 90 (HSP90)                         | FALSE                          | 1.00     | 1.51     |
| Heat shock protein 83 (Hsp83)                         | FALSE                          | 0.62     | 0.53     |
| Fructose-bisphosphate aldolase                        | FALSE                          | FALSE    | 0.80     |
| Superoxide dismutase [Mn]                             | FALSE                          | 0.66     | 1.06     |
| Superoxide dismutase [Fe]                             | FALSE                          | 0.56     | 1.22     |
| Peroxiredoxin                                         | FALSE                          | 0.64     | 0.83     |
| Beta-fructofuranosidase                               | FALSE                          | 1.42     | 0.97     |
| Na <sup>+</sup> /H <sup>+</sup> antiporter            | FALSE                          | FALSE    | FALSE    |

\*"FALSE" indicates not significantly up-regulated or down regulated.

Table S5, the expressions of the possible metal ion (excluding sodium and chloride ion) transporters or channels identified in the transcriptome

| Gene ID           | NR Description  | Swissprot Description                       | log2(FoldChange)* |          |          |
|-------------------|-----------------|---------------------------------------------|-------------------|----------|----------|
|                   |                 |                                             | 0.5h vs 0h        | 1h vs 0h | 2h vs 0h |
| c108091/f1p0/1535 | CDF transporter | --                                          | FALSE             | FALSE    | FALSE    |
| c7863/f1p0/1087   | --              | Copper transporter 5                        | FALSE             | FALSE    | FALSE    |
| c2215/f6p0/1401   | --              | Fe(2+)/Mn(2+) transporter pcl1              | FALSE             | FALSE    | FALSE    |
| c55681/f3p0/1252  | --              | Magnesium transporter MgtE                  | FALSE             | FALSE    | UP       |
| c202479/f1p0/1244 | --              | Magnesium transporter MRS2-1                | FALSE             | FALSE    | FALSE    |
| c5554/f1p0/1870   | --              | Magnesium transporter MRS2-A                | FALSE             | FALSE    | UP       |
| c157998/f1p0/1424 | --              | Molybdate-anion transporter                 | FALSE             | FALSE    | FALSE    |
| c155710/f1p0/1468 | --              | Probable boron transporter 2                | FALSE             | FALSE    | UP       |
| c11961/f1p0/1648  | --              | Probable magnesium transporter<br>NIPA5     | FALSE             | FALSE    | FALSE    |
| c73336/f1p0/1689  | --              | Probable metal-nicotianamine<br>transporter | FALSE             | FALSE    | FALSE    |
| c271360/f1p0/1019 | --              | Putative magnesium transporter<br>MRS2-D    | FALSE             | FALSE    | FALSE    |
| c21210/f1p0/1462  | --              | Uncharacterized transporter<br>C11D3.06     | FALSE             | FALSE    | UP       |
| c235505/f1p1/409  | --              | Vacuolar iron transporter homolog<br>1      | FALSE             | NA       | NA       |
| c47111/f1p0/1787  | --              | Zinc transporter 4                          | FALSE             | FALSE    | FALSE    |
| c2107/f1p0/2339   | --              | Zinc transporter 7                          | FALSE             | FALSE    | UP       |
| c20166/f2p0/1213  | --              | Zinc transporter ZTP29                      | FALSE             | FALSE    | DOWN     |
| c157724/f1p0/1157 | --              | Zinc transporter ZupT                       | FALSE             | FALSE    | FALSE    |
| c2575/f1p0/2693   | --              | ABC transporter B family member<br>28       | FALSE             | FALSE    | UP       |
| c118548/f2p0/1585 | --              | ABC transporter C family member<br>11       | FALSE             | FALSE    | UP       |
| c78031/f1p0/1808  | --              | ABC transporter E family member<br>2        | FALSE             | FALSE    | FALSE    |
| c202919/f1p0/1467 | --              | ABC transporter F family member<br>2        | FALSE             | FALSE    | DOWN     |
| c89604/f1p0/962   | --              | ABC transporter F family member<br>3        | FALSE             | FALSE    | FALSE    |
| c244316/f1p0/969  | --              | ABC transporter F family member<br>4        | FALSE             | FALSE    | UP       |
| c116462/f1p0/1155 | --              | ABC transporter G family member<br>21       | FALSE             | FALSE    | FALSE    |
| c158998/f1p0/1778 | --              | ABC transporter G family member<br>22       | DOWN              | FALSE    | UP       |
| c2842/f1p0/2112   | --              | ABC transporter G family member<br>9        | DOWN              | FALSE    | UP       |

|                   |    |                                           |       |       |       |
|-------------------|----|-------------------------------------------|-------|-------|-------|
| c3652/f1p1/759    | -- | ABC transporter I family member<br>10     | FALSE | FALSE | FALSE |
| c106076/f1p0/1615 | -- | ABC transporter I family member<br>11     | FALSE | FALSE | FALSE |
| c154944/f1p0/1507 | -- | ABC transporter I family member<br>20     | DOWN  | DOWN  | DOWN  |
| c51535/f1p0/1387  | -- | ABC transporter I family member<br>6      | FALSE | FALSE | FALSE |
| c379117/f1p0/783  | -- | Ion channel CASTOR                        | FALSE | FALSE | FALSE |
| c117188/f1p0/1573 | -- | Mechanosensitive ion channel<br>protein 5 | FALSE | FALSE | UP    |

---

\*"FALSE" means no significant up- or down-regulation, "UP" means significant up-regulation, "DOWN" means significant down-regulation, and "NA" means not available.
