# Supplementary material for: Transcriptomic profiles of Dunaliella salina in response to hypersaline stress
Source: PubMed Central journal article supplement (PMC6998148; doi:10.1186/s12864-020-6507-2), 2020-02-03
Supplement: 12864_2020_6507_MOESM3_ESM.pdf [file 12864_2020_6507_MOESM3_ESM.pdf]

**carbonic anhydrase**

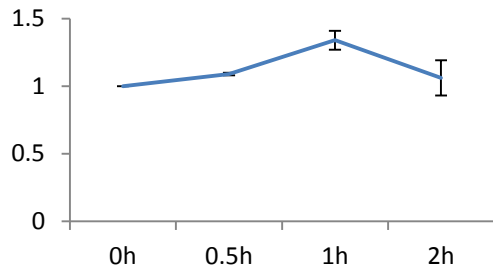

**Rubisco activase**

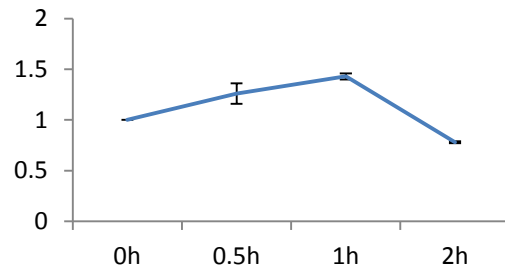

**Catalase isozyme B**

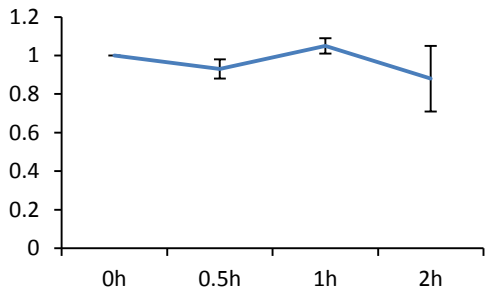

**L-ascorbate peroxidase 8**

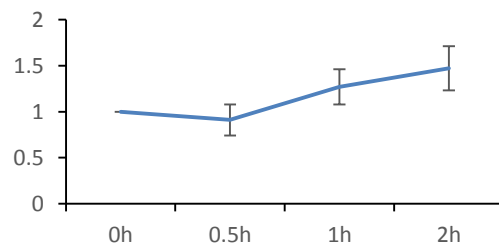

**starch phosphorylase**

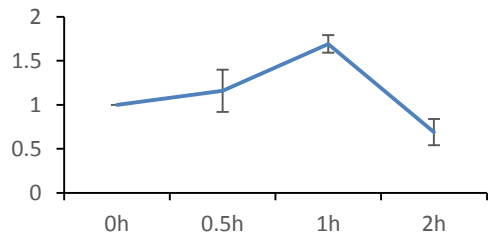

**Phosphoglucomutase**

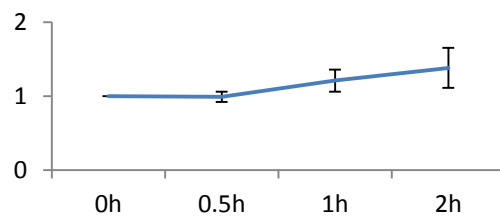

**Glucose-6-phosphate isomerase**

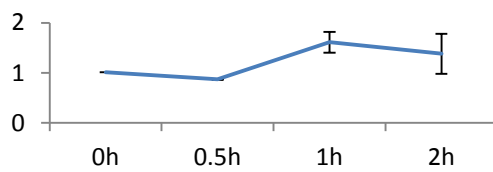

**ATP-dependent 6-phosphofructokinase 5**

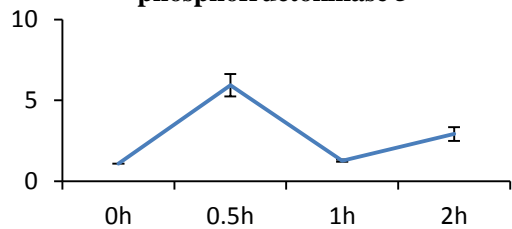

**Triosephosphate isomerase**

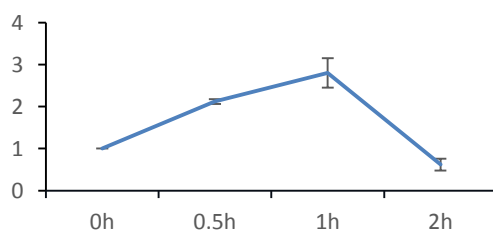

**Pyruvate kinase**

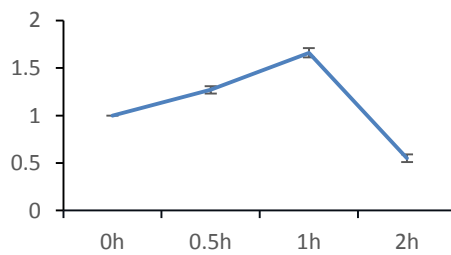

**glycerol-3-phosphate dehydrogenase (DsGPDH2)**

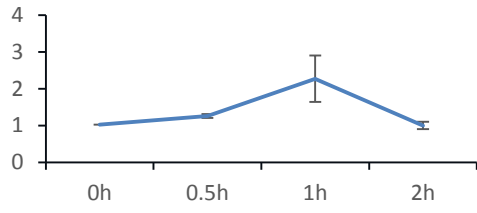

**trehalose-6-phosphate OstA**

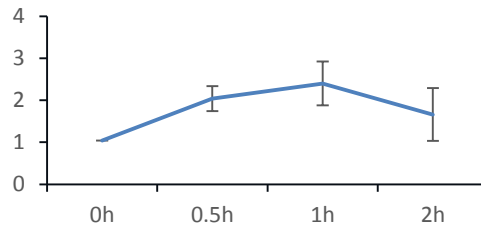

**trehalose-6-phosphate OstB**

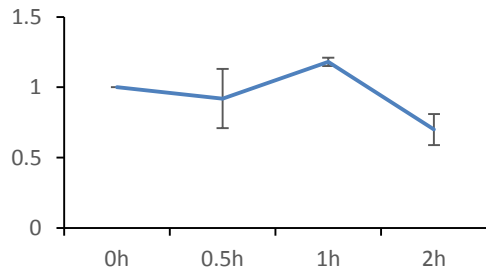

**beta-amylase**

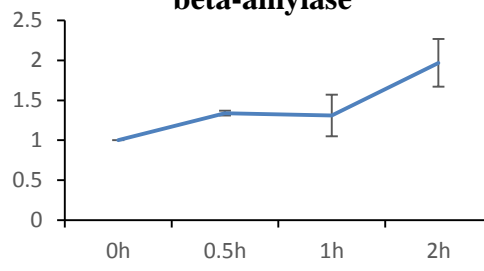

**alpha-amylase-1**

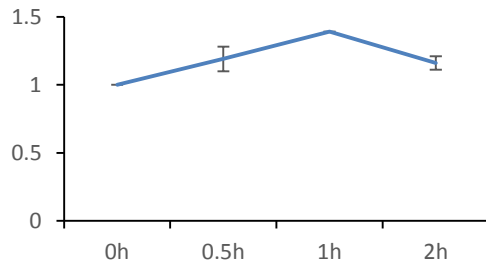

**4-alpha-glucanotransferase-DPE2**

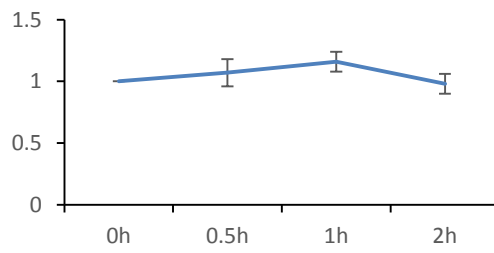

**Acetyl-CoA carboxylase**

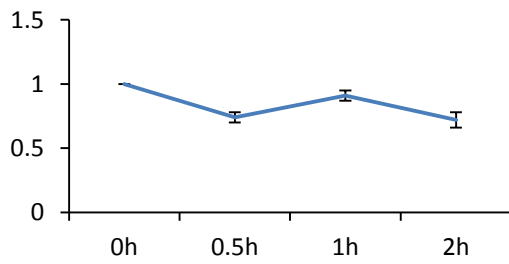

**Acetyl-coA carboxylase beta subunit**

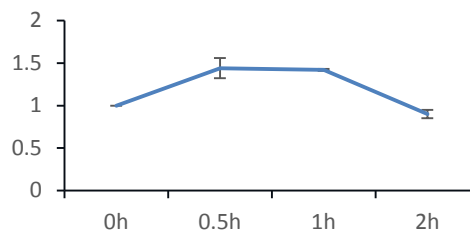

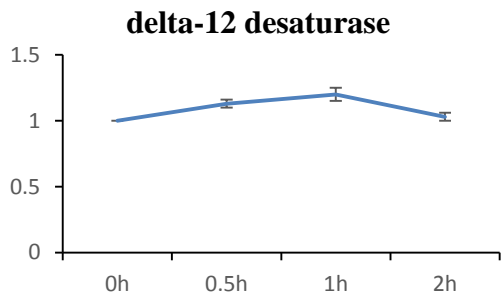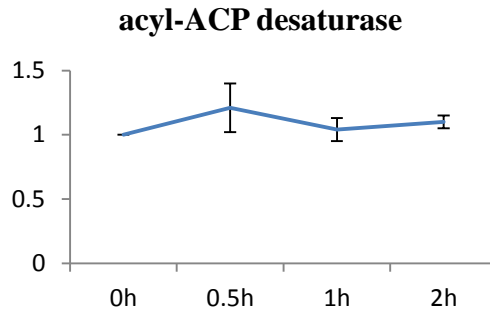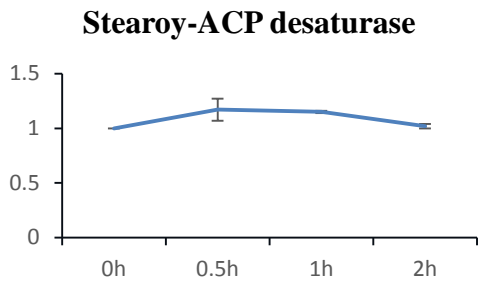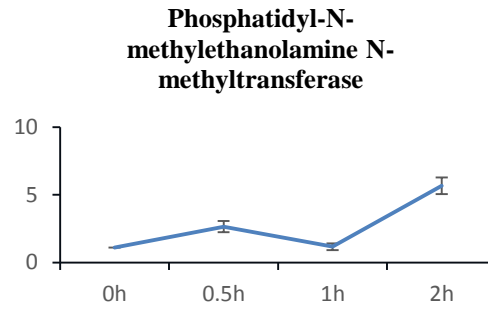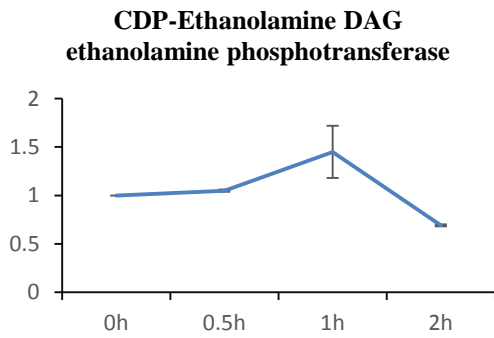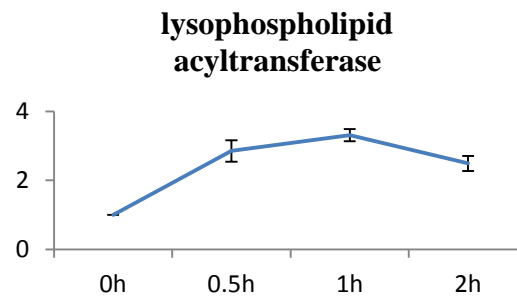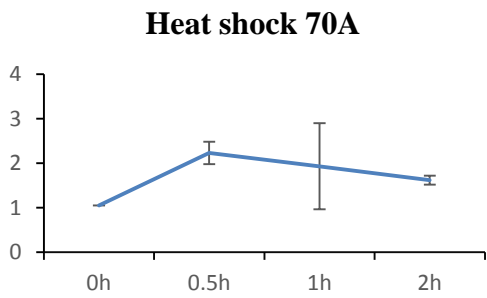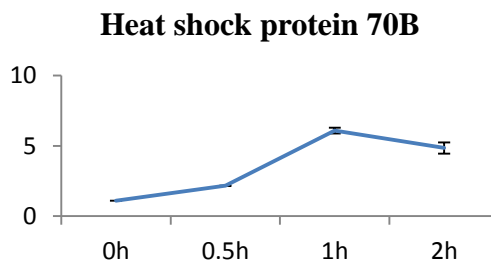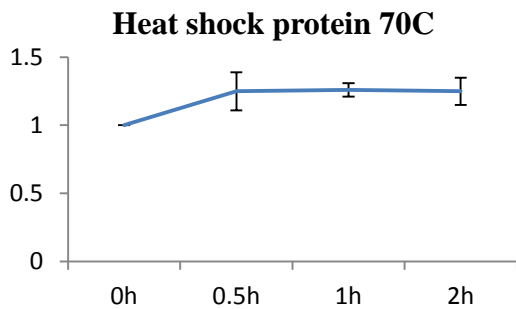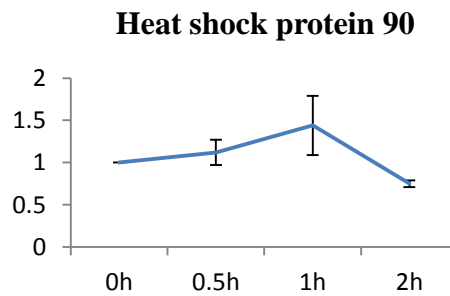

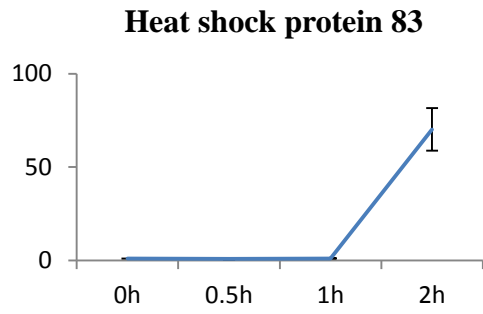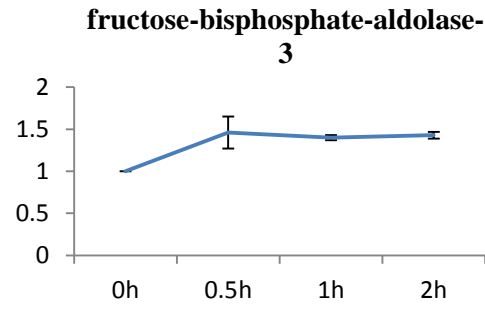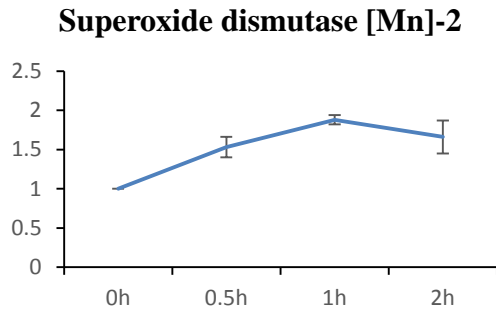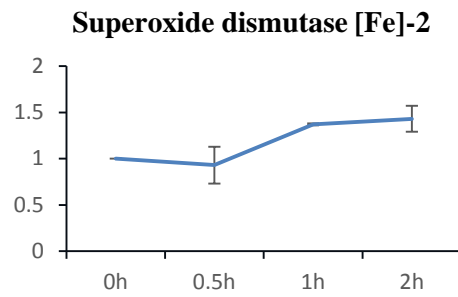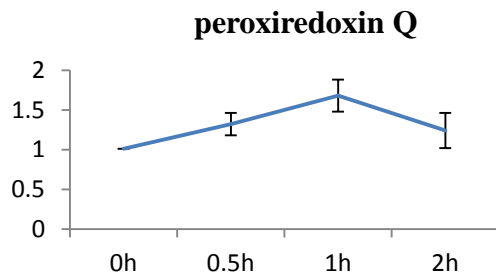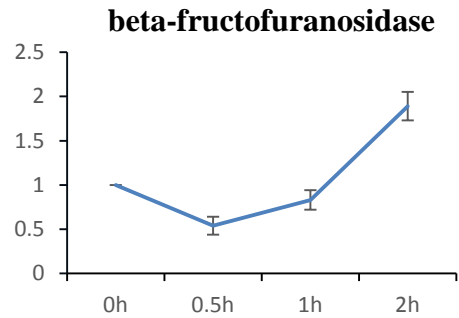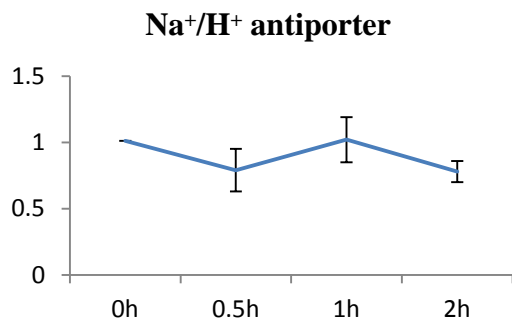

Additional file 3, confirmation of the expressions of the key genes by qPCR, the y axis represents the relative expression value; the x axis represents the salt stress time.

## Primers used in qPCR

| Gene name                                             |    | Primer sequence         |
|-------------------------------------------------------|----|-------------------------|
| fructose-bisphosphate-aldolase-3                      | ps | AAGCGTTGGCCACTGGTTTAG   |
|                                                       | pa | CACAGCACGCCATTTTGCA     |
| Rubisco activase                                      | ps | GGGCGCTGGAAGTCGATCGA    |
|                                                       | pa | TTGTTGGTGCCCGCAGCTCC    |
| carbonic anhydrase                                    | ps | AAATTGCATCAGGTGCCATCA   |
|                                                       | pa | AGCCAGCATATCCAAGCTCAGA  |
| Phosphoglucomutase                                    | ps | CCCTCAGACTCCGTTGCCA     |
|                                                       | pa | CCGGTGGGGTCTCAAAGTA     |
| delta-12 desaturase                                   | ps | CTCTGCCGATGCCGGTACA     |
|                                                       | pa | GATGAGCACGGAACGCCAG     |
| Pyruvate kinase                                       | ps | TCAGCAAGGTTGAGAACCAGGA  |
|                                                       | pa | TCATCTTTTGGGCCAGGAAGA   |
| Stearoy-ACP desaturase                                | ps | TACATCCCTTCCCAGAAGACGC  |
|                                                       | pa | GCTTTGCACGGGTTTGAGGTAG  |
| Acetyl-coA carboxylase beta subunit                   | ps | TGCTGCACGGGATCCCTGT     |
|                                                       | pa | CCTCCTGCGTGGCGTACTCA    |
| Catalase isozyme B                                    | ps | CGCACCATGCCTGGCTTT      |
|                                                       | pa | CCTCGTCGTCCAGCAGGTTG    |
| Na-H antiporter                                       | ps | CCACCCAGGCCAGAATCTGTG   |
|                                                       | pa | TGTCTGCCCTCGCACTGATCA   |
| acyl-ACP desaturase                                   | ps | GCCCCATCATCCTCAACA      |
|                                                       | pa | AGCACTTGTGCACAGGTGTCAG  |
| Heat shock protein 83-1                               | ps | AGCGGAAATCAACCAACTGCT   |
|                                                       | pa | ATGTGCATGTTGGGGTTGCT    |
| Superoxide dismutase [Mn]-2                           | ps | GGGATGTTACCGCCAAACT     |
|                                                       | pa | TGCTCCATTGCAGCGTTGTAG   |
| beta-fructofuranosidase                               | ps | AAGCCCAGCTTCCACCTGC     |
|                                                       | pa | TCGTGCGGTGGTGTGATAG     |
| Superoxide dismutase [Fe]-2                           | ps | CTCACCCCCCTCCTTATGGT    |
|                                                       | pa | CGCCACCTTGACAAGCTTCAG   |
| Acetyl-coA carboxylase beta subunit                   | ps | CATCCGGGCTATGGTTTCT     |
|                                                       | pa | TCCCTGGCTGAGTTCTGTGAC   |
| Phosphatidyl-N-methylethanolamine N-methyltransferase | ps | TGCCAAAATCCAGTCCCATAACC |
|                                                       | pa | TGAACACGCTGGTCCACACTTC  |
| ATP-dependent 6-phosphofructokinase 5                 | ps | CTGTGCTATTGCAGCGCGAA    |
|                                                       | pa | TGAGGCAGGCCAAGATCTGAG   |
| Heat shock protein 90-1                               | ps | CGTCATCCGCAGGCAGCTT     |
|                                                       | pa | CGGCTGGAGAAGAAGCGCA     |
| Heat shock protein 70C                                | ps | ATGTGAAGGACATCCTGTGCT   |
|                                                       | pa | TGTTGAGAAGACCTGGCCCTT   |
| peroxiredoxin                                         | ps | ATTAATCCACAGGGTGTGGTGC  |

|                                                      |    |                        |
|------------------------------------------------------|----|------------------------|
|                                                      | pa | GGCACACTTCTCCATGCTTCTC |
| peroxiredoxin Q                                      | ps | GAACCCCTGGATGCACCAA    |
|                                                      | pa | TTGCCCAGGCTGCATTCTC    |
| lysophospholipid acyltransferase                     | ps | CGTGTCCGTGCCTCAGCTAC   |
|                                                      | pa | GAAGGATGCCCGTGACCAG    |
| Heat shock protein 70B                               | ps | GCACCATGTGCGGCAAGGAG   |
|                                                      | pa | TGAGCTTGGTGGCCACACCG   |
| Glucose-6-phosphate isomerase                        | ps | ACGGGCTCGACGTGACCAGA   |
|                                                      | pa | TTCCACTCGCCACTGCGCA    |
| starch phosphorylase                                 | ps | CACCCCAACCAGTGGAACAA   |
|                                                      | pa | GCTCGTCCTTGACGATCTCAGA |
| Heat shock 70A                                       | ps | GAGACCGCTGGTGGTGTGATG  |
|                                                      | pa | CGCTCACCTCGTACACCTGA   |
| beta-amylase                                         | ps | CCTGAGTGGGGCTTGAGTGG   |
|                                                      | pa | GCAGCAGTGAGGATGCGCT    |
| glycerol-3-phosphate dehydrogenase (DsGPDH2)         | ps | ATGCCCAGCATGCCTCCA     |
|                                                      | pa | AGGCGTAGTGGCAGCAGCA    |
| trehalose-6-phosphate OstA                           | ps | GAGGGCCAGACATGGAACACC  |
|                                                      | pa | CGTCTCGATGCTGCTCCCAT   |
| L-ascorbate peroxidase 8                             | ps | GAGGTGCCAACGGTGCCAT    |
|                                                      | pa | TGGGAGACGTCAGGGTACTTGG |
| Triosephosphate isomerase                            | ps | AAGTTCTTTGTGGGCGGGAAC  |
|                                                      | pa | TTGCAGTTGGAGTCGCTGACA  |
| CDP-Ethanolamine DAG ethanolamine phosphotransferase | ps | GCCCTGGAGGGCTGAAGGAGT  |
|                                                      | pa | TACAACGCGGAGGCGAGGTAGG |
| alpha amylase-1                                      | ps | AGGGAAGGCCTCCTGGTGTC   |
|                                                      | pa | CCCTCAGGCAGGTTCTTCCA   |
| trehalose-6-phosphate OstB                           | ps | CCACAGATGTGGATGGCACAC  |
|                                                      | pa | GGTTGAGCTGCGAGAACACCT  |
| 4-alpha-glucanotransferase-DPE2                      | ps | ACAAGTGGTGGAGGAGAAGGCT |
|                                                      | pa | CGGCTGTCAAGCTCATGCTT   |
